# Supplementary material for: Community Health Workers and Mobile Technology: A Systematic Review of the Literature
Source: PLoS One. 2013 Jun 12;8(6):e65772. doi: 10.1371/journal.pone.0065772 (PMC3680423; doi:10.1371/journal.pone.0065772)
Supplement: Table S1 — Summary of Systematic Review. (PDF) [file pone.0065772.s001.pdf]

## Summary of Systematic Review

| First Author  |  | Pub Year | Article Title                                                                                                                                                                | mHealth Tool                                | mHealth Platform or Application              | Region                 | Health Issue addressed by CHW          | Purpose of technology                                                                             | Design           |                    |              | Methods |       | Taxonomy of Strategies (Berman) |                       |                      |                          |            |                        |                         |         | Outcomes of Organization Performance (Berman) |             |        |          |                |  |
|---------------|--|----------|------------------------------------------------------------------------------------------------------------------------------------------------------------------------------|---------------------------------------------|----------------------------------------------|------------------------|----------------------------------------|---------------------------------------------------------------------------------------------------|------------------|--------------------|--------------|---------|-------|---------------------------------|-----------------------|----------------------|--------------------------|------------|------------------------|-------------------------|---------|-----------------------------------------------|-------------|--------|----------|----------------|--|
|               |  |          |                                                                                                                                                                              |                                             |                                              |                        |                                        |                                                                                                   | Non experimental | Quasi-experimental | Experimental | Qual    | Quant | Standards & Guidelines          | Organizational Design | Education & Training | Proc Improvmt, Tech Dvnt | Incentives | Organizational Culture | Leadership & Management | Quality | Efficiency                                    | Utilization | Access | Learning | Sustainability |  |
| Andreatta     |  | 2011     | Using cell phones to collect postpartum hemorrhage outcome data in rural Ghana.                                                                                              | Basic mobile phones                         | Global System for Mobile Communication (GSM) | Africa                 | MCH                                    | Health Data Collection                                                                            | x                |                    |              |         | x     |                                 |                       | x                    | x                        |            |                        |                         | x       |                                               |             |        |          |                |  |
| Bernabe-Ortiz |  | 2008     | Handheld computers for self-administered sensitive data collection: A comparative study in Peru                                                                              | Personalized Digital Assistant (PDA)        | PDA PREVEN                                   | Central/ South America | Sexual & reproductive health           | Health Data Collection                                                                            |                  | x                  |              |         | x     |                                 |                       |                      | x                        |            |                        |                         | x       |                                               |             |        |          |                |  |
| Birnbaum      |  | 2012     | Automated quality control for mobile data collection                                                                                                                         | Basic mobile phones                         | CommCare                                     | NA                     | NA                                     | Data Quality Control                                                                              |                  | x                  |              |         | x     |                                 |                       |                      | x                        |            |                        |                         |         |                                               |             |        |          |                |  |
| Chang         |  | 2011     | Impact of a mHealth intervention for peer health workers on AIDS care in rural Uganda: a mixed methods evaluation of a cluster-randomized trial                              | Basic mobile phones                         | Short Message Service (SMS)                  | Africa                 | HIV/AIDS                               | Information on Demand - Health Data Collection - Person-to-Person Communication                   |                  |                    | x            | x       | x     | x                               |                       |                      | x                        |            | x                      | x                       | x       |                                               |             |        | x        |                |  |
| Chib          |  | 2010     | The Aceh Besar midwives with mobile phones project: Design and evaluation perspectives using the information and communication technologies for healthcare development model | Mobile phones equipped with GRPS technology | Short Message Service (SMS)                  | Asia                   | MCH, Sexual & reproductive health      | Health Data Collection - Person-to-Person Communication                                           |                  | x                  |              | x       | x     | x                               |                       |                      | x                        |            | x                      | x                       | x       | x                                             |             | x      | x        |                |  |
| Chib          |  | 2008     | Midwives and mobiles: using ICTs to improve healthcare in Aceh Besar, Indonesia                                                                                              | Mobile phones equipped with GRPS technology | Short Message Service (SMS)                  | Asia                   | MCH, Sexual & reproductive health      | Health Data Collection - Person-to-Person Communication                                           |                  | x                  |              |         | x     |                                 | x                     |                      | x                        |            | x                      | x                       | x       | x                                             |             | x      | x        |                |  |
| Curioso       |  | 2005     | Design and Implementation of Cell-PREVEN: A Real-Time Surveillance System for Adverse Events Using Cell Phones in Peru                                                       | Basic mobile phones                         | Cell PREVEN                                  | South America          | Sexual & reproductive health, HIV/AIDS | Alerts & Reminders -- Information on Demand -- Health Data Collection -- Electronic Health Record | x                |                    |              |         | x     |                                 |                       |                      | x                        |            |                        |                         | x       |                                               |             |        | x        |                |  |
| DeRenzi       |  | 2012     | Improving community health worker performance through automated SMS                                                                                                          | Basic mobile phones                         | CommCare                                     | Africa                 | MCH and general health                 | Alerts & Reminders                                                                                |                  |                    | x            |         | x     |                                 |                       |                      | x                        |            |                        |                         | x       | x                                             |             |        |          | x              |  |
| DeRenzi       |  | 2012     | Improving community health worker performance through automated SMS                                                                                                          | Basic mobile phones                         | CommCare                                     | Africa                 | MCH and general health                 | Alerts & Reminders                                                                                |                  |                    | x            |         | x     |                                 |                       |                      | x                        |            |                        | x                       | x       | x                                             |             |        |          | x              |  |
| DeRenzi       |  | 2012     | Improving community health worker performance through automated SMS                                                                                                          | Basic mobile phones                         | CommCare                                     | Africa                 | MCH and general health                 | Alerts & Reminders                                                                                |                  |                    | x            |         | x     |                                 |                       |                      | x                        |            |                        | x                       | x       | x                                             |             | x      | x        |                |  |
| DeRenzi       |  | 2012     | Improving community health worker performance through automated SMS                                                                                                          | Basic mobile phones                         | CommCare                                     | Africa                 | MCH and general health                 | Alerts & Reminders                                                                                | x                |                    |              | x       |       |                                 |                       |                      | x                        |            |                        | x                       | x       | x                                             |             |        |          | x              |  |
| Diero         |  | 2006     | A computer-based medical record system and personal digital assistants to assess and follow patients with respiratory tract infections visiting a rural Kenyan health centre | Personalized Digital Assistant (PDA)        | Mosoriot Medical Record System               | Africa                 | Acute respiratory infections           | Health Data Collection - Decision Support                                                         | x                |                    |              |         | x     | x                               |                       |                      | x                        |            |                        |                         | x       | x                                             |             |        |          |                |  |
| Dwolatzky     |  | 2006     | Linking the global positioning system (GPS) to a personal digital assistant (PDA) to support tuberculosis control in South Africa: a pilot study                             | Personalized Digital Assistant (PDA)        | Short Message Service (SMS)                  | Africa                 | HIV/AIDS, TB                           | Mapping                                                                                           |                  | x                  |              |         | x     |                                 |                       |                      | x                        |            |                        |                         |         | x                                             |             |        |          |                |  |
| Florez-Arango |  | 2011     | Performance factors of mobile rich media job aids for community health workers                                                                                               | Video-capable mobile phones                 | Windows Mobile Guideview                     | Central/ South America | Childhood illness, trauma, non-trauma  | Decision Support                                                                                  |                  |                    | x            |         | x     | x                               |                       |                      | x                        |            |                        |                         | x       |                                               |             |        | x        |                |  |
| Gisore        |  | 2012     | Community based weighing of newborns and use of mobile phones by village elders in rural settings in Kenya: a decentralised approach to health care provision                | Mobile phone & weighing scale               | Short Message Service (SMS)                  | Africa                 | MCH                                    | Health Data Collection                                                                            |                  | x                  |              |         | x     |                                 | x                     | x                    | x                        |            |                        |                         | x       |                                               |             |        |          |                |  |

|                |      |                                                                                                                                                    |                                             |                                    |        |                                        |                                                                                                              |   |   |   |   |   |   |   |   |   |  |  |  |   |   |   |   |   |   |  |
|----------------|------|----------------------------------------------------------------------------------------------------------------------------------------------------|---------------------------------------------|------------------------------------|--------|----------------------------------------|--------------------------------------------------------------------------------------------------------------|---|---|---|---|---|---|---|---|---|--|--|--|---|---|---|---|---|---|--|
| Hoffman        | 2010 | Mobile Direct Observation Treatment for tuberculosis patients: a technical feasibility pilot using mobile phones in Nairobi, Kenya                 | Video-capable mobile phones                 | Short Message Service (SMS), Video | Africa | TB                                     | Health Data Collection - Direct Observation                                                                  | x |   |   | x | x |   | x |   | x |  |  |  | x |   |   | x |   |   |  |
| Jones          | 2012 | "Even if You Know Everything You Can Forget": Health Worker Perceptions of Mobile Phone Text-Messaging to Improve Malaria Case-Management in Kenya | Basic mobile phones                         | Short Message Service (SMS)        | Africa | Malaria                                | Alerts & Reminders                                                                                           | x |   |   | x |   | x |   | x | x |  |  |  | x |   | x |   | x |   |  |
| Lee            | 2011 | Midwives' cell phone use and health knowledge in rural communities                                                                                 | Mobile phones equipped with GPRS technology | Short Message Service (SMS)        | Asia   | MCH, Sexual & reproductive health      | Health Data Collection - Person-to-Person Communication                                                      |   | x |   |   | x | x |   | x | x |  |  |  | x |   |   | x | x |   |  |
| LeMay          | 2012 | Reaching Remote Health Workers in Malawi: Baseline Assessment of a Pilot mHealth Intervention                                                      | Basic mobile phones                         | FrontlineSMS                       | Africa | Sexual & reproductive health, HIV/AIDS | Information on Demand                                                                                        |   |   | x | x | x |   |   | x | x |  |  |  | x | x |   |   |   |   |  |
| Mahmud         | 2010 | A text message-based intervention to bridge the healthcare communication gap in the rural developing world                                         | Basic mobile phones                         | FrontlineSMS Medic                 | Africa | HIV/AIDS, TB                           | Alerts & Reminders - Information on Demand - Health Data Collection - Decision Support - Pharmacy Management | x |   |   |   | x |   | x |   | x |  |  |  |   | x | x | x |   |   |  |
| Mhila          | 2009 | Using Mobile Applications for Community-based Social Support for Chronic Patients                                                                  | Basic mobile phones                         | CommCare                           | Africa | HIV/AIDS                               | Health Data Collection - Electronic Medical Record                                                           |   |   | x |   | x |   |   |   | x |  |  |  | x |   |   |   |   |   |  |
| Rajput         | 2012 | Evaluation of an Android-based mHealth system for population surveillance in developing countries                                                  | Android mobile phone                        | Open Data Kit                      | Africa | HIV/AIDS                               | Health Data Collection                                                                                       | x |   |   |   | x | x |   |   | x |  |  |  | x | x |   |   |   |   |  |
| Ramachandran   | 2010 | Mobilizing health workers in rural India                                                                                                           | Video-capable mobile phones                 | Short Message Service (SMS), Video | Asia   | MCH                                    | Multimedia Content                                                                                           |   | x |   |   | x | x |   | x | x |  |  |  | x |   |   |   | x |   |  |
| Ramachandran   | 2010 | Research and Reality: Using Mobile Messages to Promote Maternal Health in Rural India                                                              | Video-capable mobile phones                 | Short Message Service (SMS), Video | Asia   | MCH                                    | Multimedia Content                                                                                           |   | x |   |   | x |   |   | x | x |  |  |  | x |   |   |   |   |   |  |
| Rotheram-Borus | 2011 | Project Mashimobisane: a cluster randomised controlled trial with peer mentors to improve outcomes for pregnant mothers living with HIV            | Basic mobile phones                         | Mobile Researcher                  | Africa | HIV/AIDS                               | Alerts & Reminders - Health Data Collection                                                                  |   |   | x |   | x | x |   | x | x |  |  |  | x |   | x | x |   |   |  |
| Svoronos       | 2010 | CommCare: Automated Quality Improvement To Strengthen Community-Based Health The Need for Quality Improvement for CHWs                             | Basic mobile phones                         | CommCare                           | Africa | MCH                                    | Alerts & Reminders - Decision Support - Electronic Medical Record                                            | x |   |   |   | x |   |   |   | x |  |  |  | x | x |   |   |   | x |  |
| Tomlinson      | 2009 | The use of mobile phones as a data collection tool: a report from a household survey in South Africa                                               | Basic mobile phones                         | Mobile Researcher                  | Africa | NA                                     | Health Data Collection                                                                                       | x |   |   |   | x |   |   |   | x |  |  |  | x | x | x |   |   |   |  |
| Zurovac        | 2011 | The effect of mobile phone text-message reminders on Kenyan health workers' adherence to malaria treatment guidelines: a cluster randomised trial  | Basic mobile phones                         | Short Message Service (SMS)        | Africa | Malaria                                | Alerts & Reminders                                                                                           |   |   | x |   | x | x |   |   | x |  |  |  | x |   |   |   |   |   |  |
